# Supplementary material for: The effects of Rho-associated kinase inhibitor Y-27632 on primary human corneal endothelial cells propagated using a dual media approach
Source: PubMed Central journal article supplement (PMC4387913; doi:10.1038/srep09167), 2015-03-16
Supplement: srep09167-s1.pdf [file srep09167-s1.pdf]

**Manuscript Title:****The effects of Rho-associated kinase inhibitor Y-27632 on primary human corneal endothelial cells propagated using a dual media approach**

Gary S.L. Peh,<sup>1,2</sup> Khadijah Adnan,<sup>1</sup> Benjamin L. George,<sup>1</sup> Heng-Pei Ang,<sup>1</sup> Xin-Yi Seah,<sup>1</sup> Donald T. Tan,<sup>1,3,5</sup> Jodhbir S. Mehta<sup>1,2,3,4</sup>.

<sup>1</sup> Tissue Engineering and Stem Cell Group, Singapore Eye Research Institute, Singapore.

<sup>2</sup> Duke-NUS Graduate Medical School, Singapore.

<sup>3</sup> Singapore National Eye Centre, Singapore.

<sup>4</sup> School of Material Science and Engineering, Nanyang Technological University, Singapore.

<sup>5</sup> Yong Loo Lin School of Medicine, National University of Singapore, Singapore.

| Supplementary Table 1. Proliferation rates of human CECs isolated from older donors (aged 60 and above) with and without Y-27632 |     |                         |                         |
|----------------------------------------------------------------------------------------------------------------------------------|-----|-------------------------|-------------------------|
| Donor                                                                                                                            | Age | M4-F99 Medium (Control) | M4-F99 Medium (Y-27632) |
| 34                                                                                                                               | 66  | 22.3%                   | 16.2%                   |
| 35                                                                                                                               | 65  | 25.6%                   | 26.8%                   |
| 36                                                                                                                               | 60  | 9.3%                    | 6.2%                    |
| 37                                                                                                                               | 66  | 1.2%                    | 1.8%                    |

For human CECs isolated from older donors aged 60 years and above, Click-iT Edu incorporation assay showed no statistical significance in the proliferation of CECs in the presence of Y-27632 when compared to non-treated controls.
